# Supplementary material
Source: Springer Nature journal article supplement (https://www.springermedizin.de/resource/supplementary/12879_2011_1734_MOESM8_ESM.pdf/9443904)

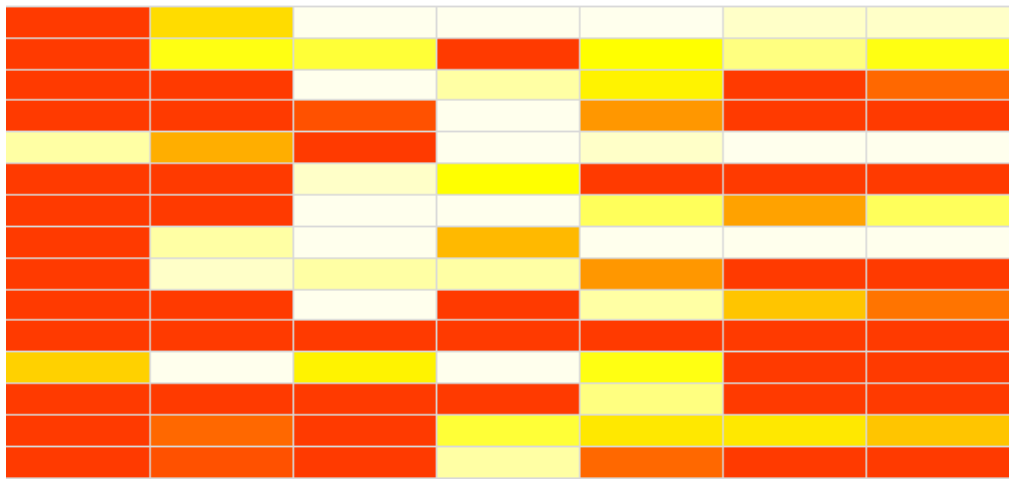

Belarus

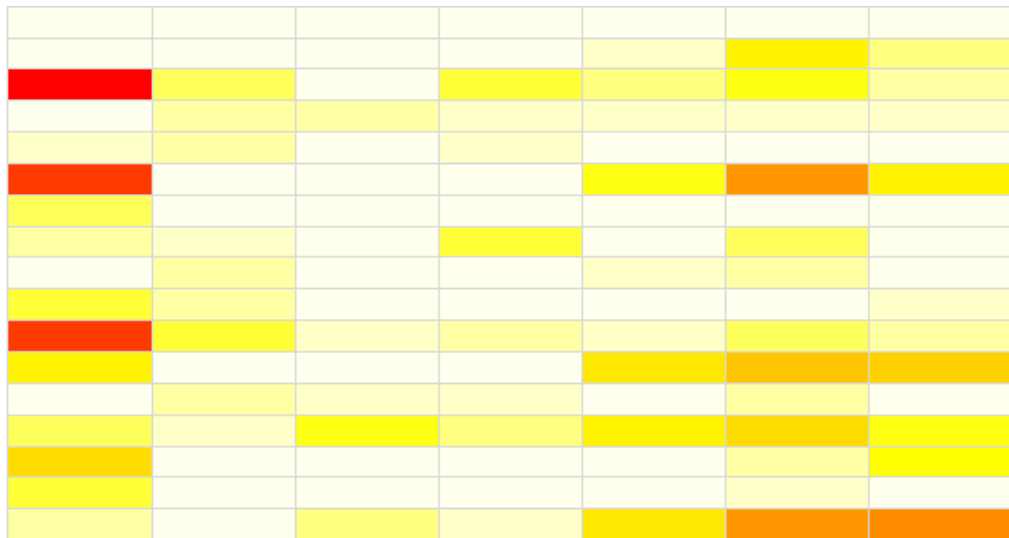

Sweden

Rv3804c

Rv1886c

Rv3875

Rv0288

Rv0754

Rv0978c

Rv1917c

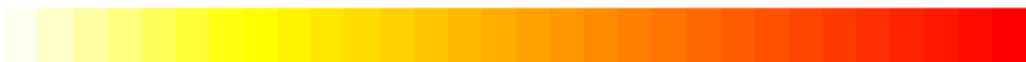

pg/ml IFN- $\gamma$

0

100

200

300

400

Supplement: MOESM8 [file 9443904]
